# Supplementary material for: A reversible near-infrared fluorescence probe for the monitoring of HSO3−/H2O2-regulated cycles in vivo
Source: Royal Society of Chemistry journal article supplement (doi:10.1039/d1nj03507j), 2021-01-01
Supplement: d1nj03507j1.pdf [file d1nj03507j1.pdf]

**Electronic Supplementary Material (ESI) for New Journal of Chemistry. This journal is © The Royal Society of Chemistry 2021**

## **Electronic Supplementary Information**

### **A reversible near-infrared fluorescence probe for the monitoring HSO<sub>3</sub><sup>-</sup>/H<sub>2</sub>O<sub>2</sub> regulated cycles *in vivo***

Qiuying Song,<sup>a</sup> Bo Zhou,<sup>a</sup> Dongyu Zhang,<sup>a</sup> Haijun Chi,<sup>a</sup> Hongmin Jia,<sup>\*a</sup> Peixun Zhu,<sup>\*b</sup> Zhiqiang Zhang,<sup>a</sup> Qingtao Meng<sup>\*a</sup> and Run Zhang<sup>c</sup>

<sup>a</sup> Key Laboratory for Functional Material, Educational Department of Liaoning Province, University of Science and Technology Liaoning, Anshan, Liaoning, 114051, P. R. China.

E-mail: qtmeng@ustl.edu.cn; jhongmin66@163

<sup>b</sup> School of Chemical Engineering, University of Science and Technology Liaoning, Anshan, Liaoning, 114051, P. R. China.

E-mail: zpx6311@126.com

<sup>c</sup> Australian Institute for Bioengineering and Nanotechnology, The University of Queensland, Brisbane, 4072, Australia

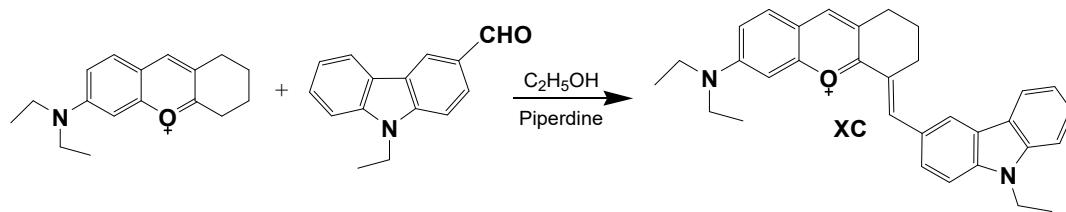

**Scheme S1** Synthetic procedure of the near-infrared out fluorescent probe (XC).

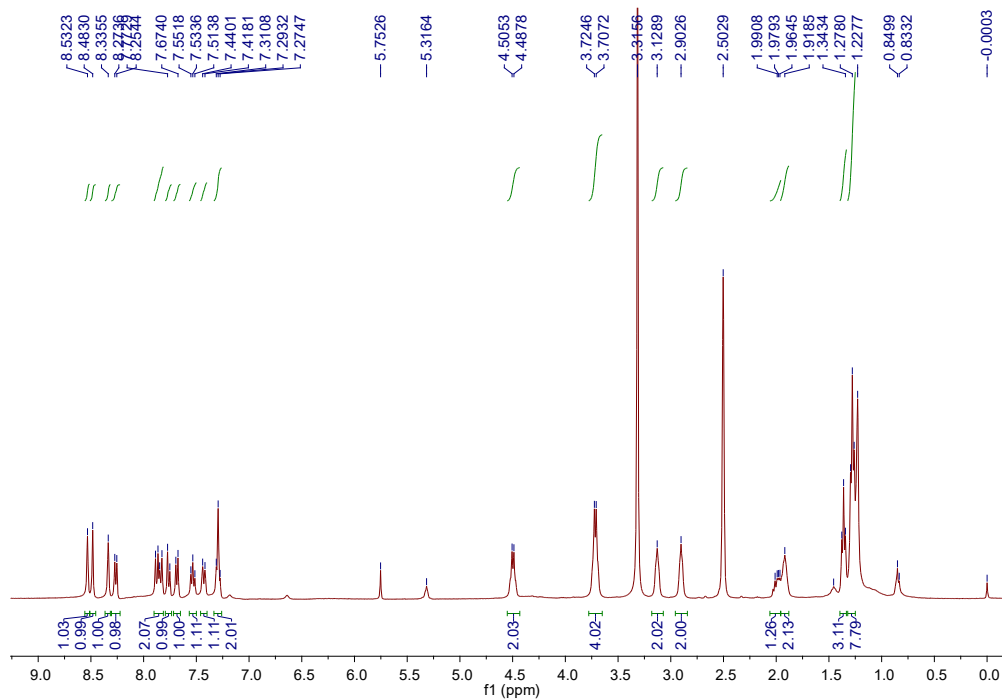

**Fig. S1**  $^1H$  NMR of XC ( $DMSO-d_6$ ).

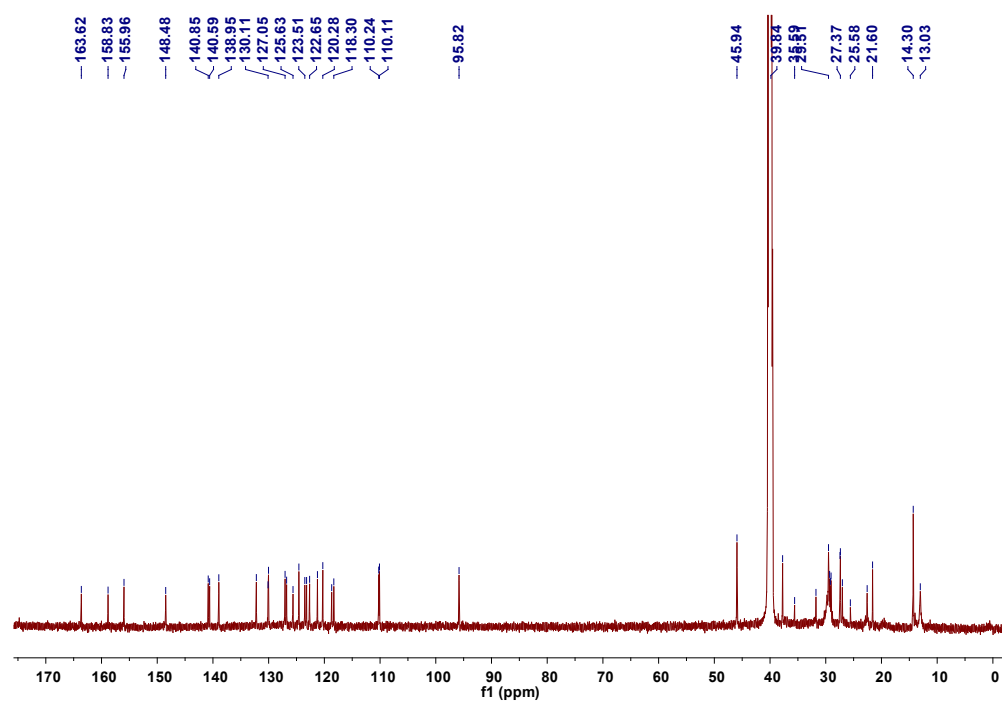

**Fig. S2**  $^{13}C$  NMR of XC ( $DMSO-d_6$ ).

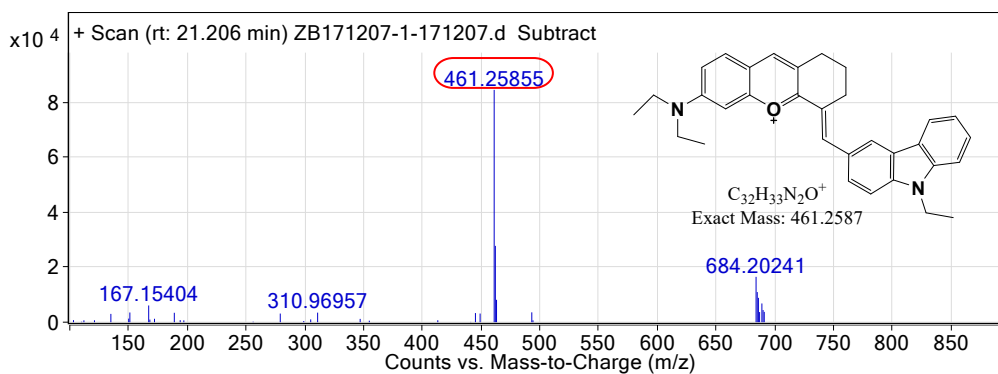

Fig. S3 HR MS of XC.

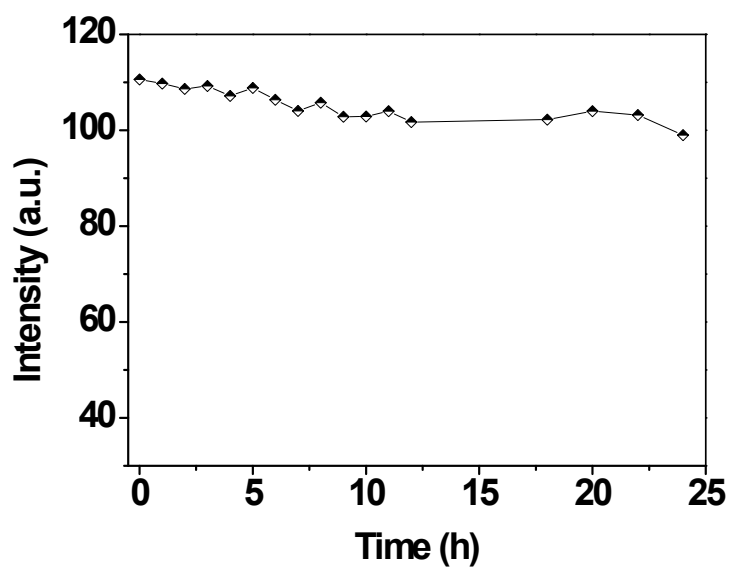

Fig. S4 Fluorescence intensities of XC (10  $\mu\text{M}$ ) at different time in PBS buffer (DMSO:HEPES=3:7, v/v; pH=7.4). The intensities were recorded at 684 nm, excitation was performed at 605 nm.

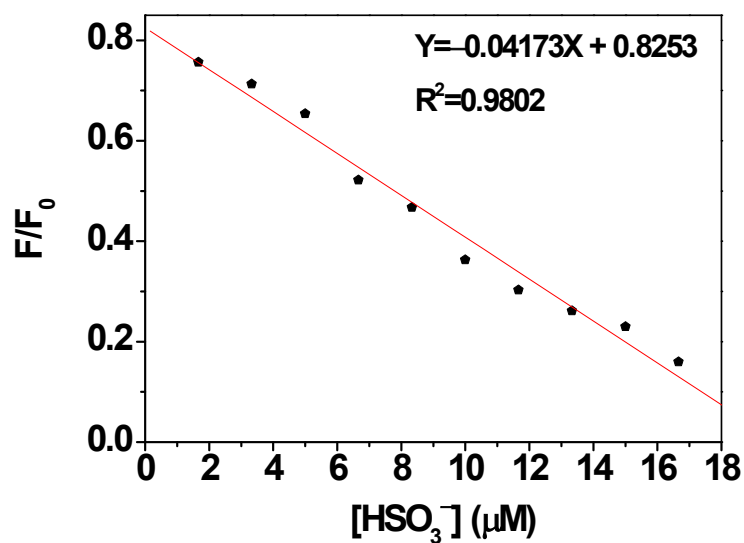

Fig. S5 The fluorescence intensity changes at 684 nm of XC (5  $\mu\text{M}$ ) as a function of  $\text{HSO}_3^-$  concentration (1.66-16.66  $\mu\text{M}$ ). Excitation was performed at 605 nm.

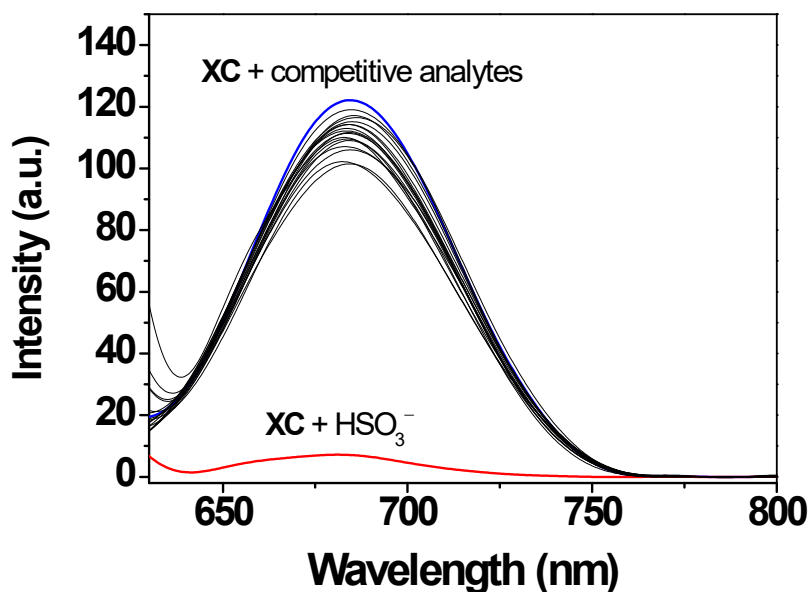

**Fig. S6** Fluorescence spectra of XC (10  $\mu\text{M}$ ) in the presence of various analytes (50  $\mu\text{M}$ ) in HEPES aqueous buffer (DMSO:HEPES=3:7, 20 mM, pH=7.4). Excitation was performed at 605nm.

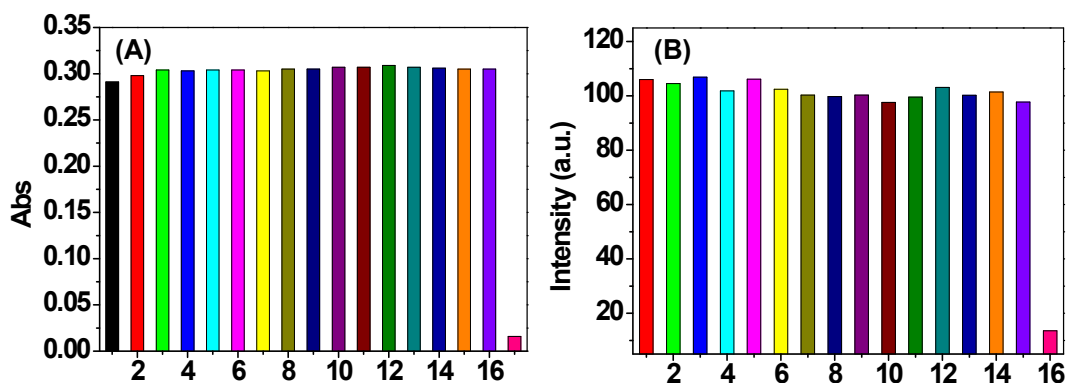

**Fig. S7** (A) Absorption spectra and (B) fluorescence response of XC (10  $\mu\text{M}$ ) towards various biological cations (40  $\mu\text{M}$ ) in PBS buffer (DMSO:HEPES=3:7, v/v; pH=7.4): 1. Blank, 2. Zn<sup>2+</sup>, 3. Ni<sup>2+</sup>, 4. Al<sup>3+</sup>, 5. Cr<sup>3+</sup>, 6. Ca<sup>2+</sup>, 7. Mg<sup>2+</sup>, 8. Ba<sup>2+</sup>, 9. Li<sup>+</sup>, 10. K<sup>+</sup>, 11. Fe<sup>3+</sup>, 12. Co<sup>2+</sup>, 13. Cd<sup>2+</sup>, 14. Pb<sup>2+</sup>, 15. Na<sup>+</sup>, 16. HSO<sub>3</sub><sup>-</sup>. The fluorescence intensities were recorded at 684 nm, excitation at 605 nm.

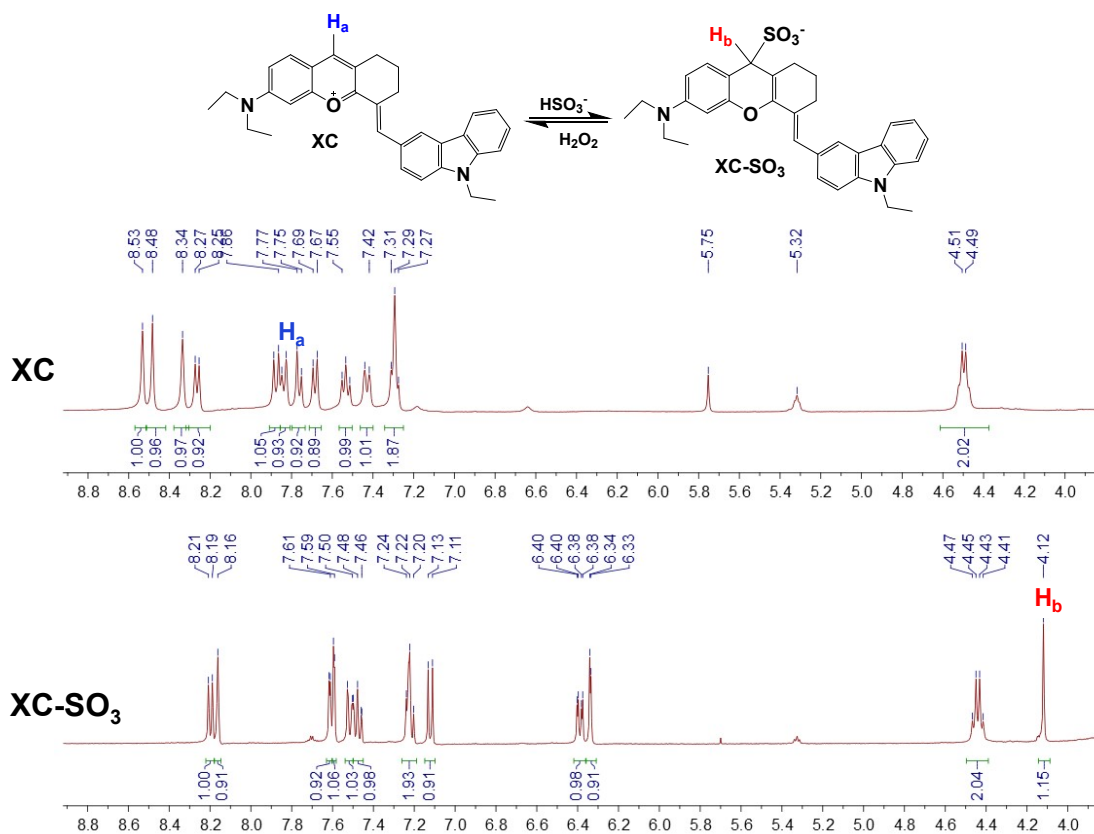

**Fig. S8** <sup>1</sup>H NMR of XC in the presence of HSO<sub>3</sub><sup>-</sup> in DMSO-*d*<sub>6</sub>/D<sub>2</sub>O mixed solvent.

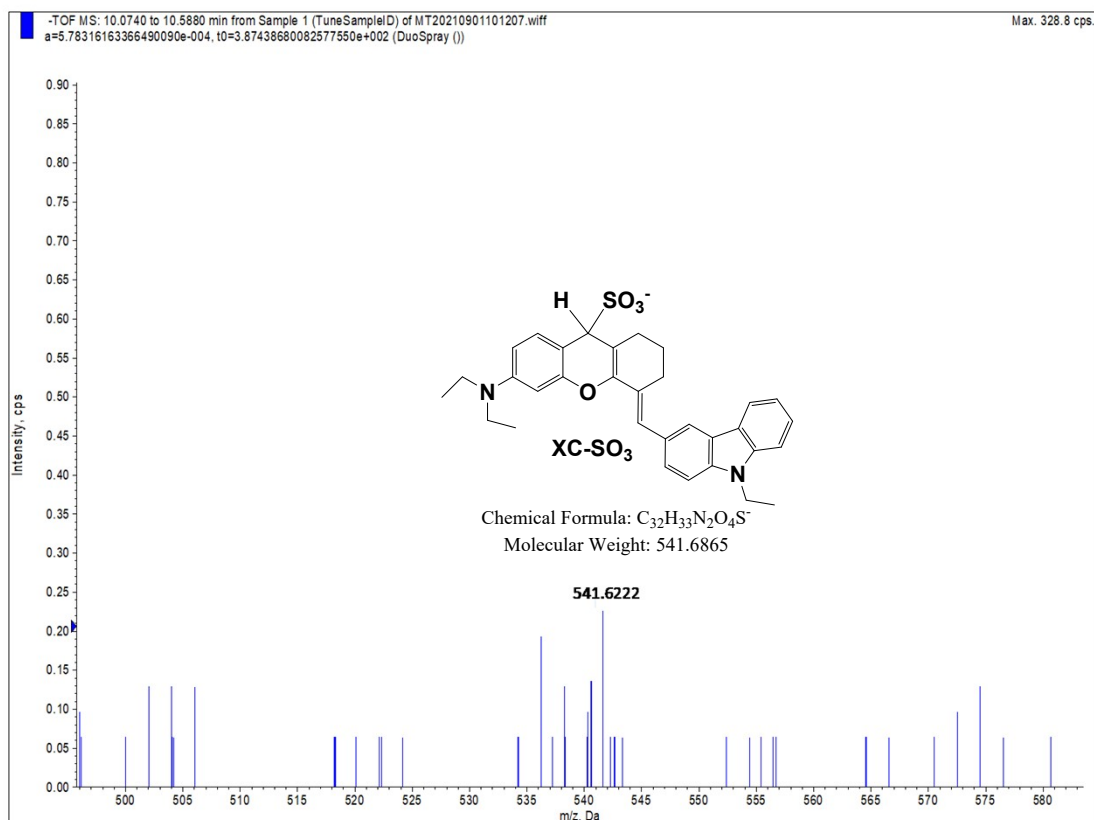

**Fig. S9** HR MS of XC in the presence of HSO<sub>3</sub><sup>-</sup>.

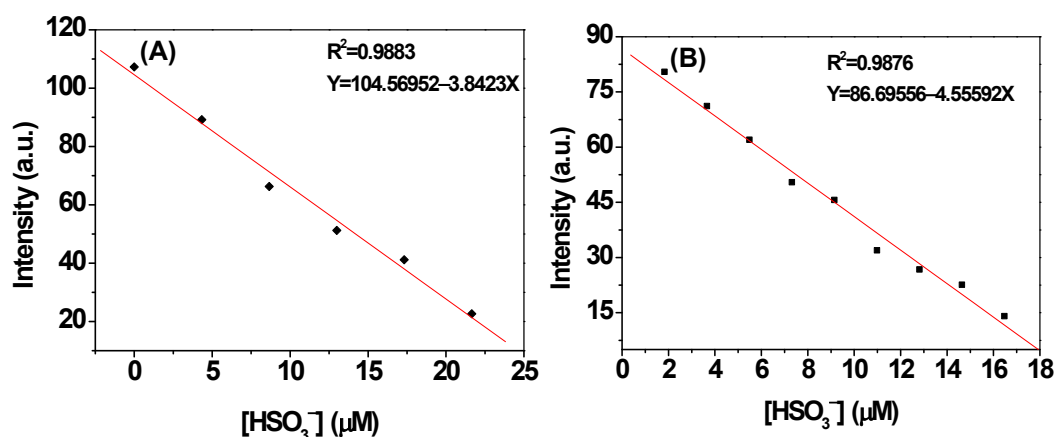

**Fig. S10** The fluorescence intensity changes at 684 nm of XC (5  $\mu\text{M}$ ) as a function of  $\text{HSO}_3^-$  concentration in the aqueous solution of (A) white wine and (B) sugar samples. Excitation was performed at 605 nm.

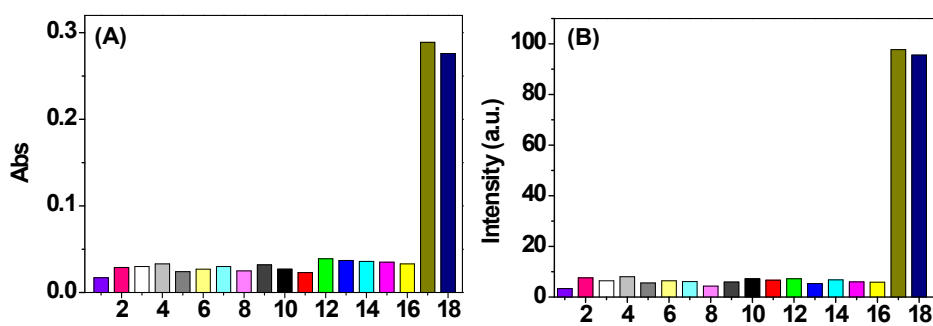

**Fig. S11** (A) Absorption and (B) fluorescence spectra response of XC- $\text{SO}_3$  (10  $\mu\text{M}$ ) towards various biological cations (50  $\mu\text{M}$ ) in PBS buffer (DMSO:HEPES=3:7, v/v; pH=7.4): 1. Blank, 2.  $\text{Zn}^{2+}$ , 3.  $\text{Ni}^{2+}$ , 4.  $\text{Al}^{3+}$ , 5.  $\text{Cr}^{3+}$ , 6.  $\text{Ca}^{2+}$ , 7.  $\text{Mg}^{2+}$ , 8.  $\text{Ba}^{2+}$ , 9.  $\text{Li}^+$ , 10.  $\text{K}^+$ , 11.  $\text{Fe}^{3+}$ , 12.  $\text{Co}^{2+}$ , 13.  $\text{Cd}^{2+}$ , 14.  $\text{Pb}^{2+}$ , 15.  $\text{Na}^+$ , 16. mixed cations, 17.  $\text{HSO}_3^-$ , 18. mixed cations +  $\text{HSO}_3^-$ . The fluorescence intensities were recorded at 684 nm, excitation at 605 nm.

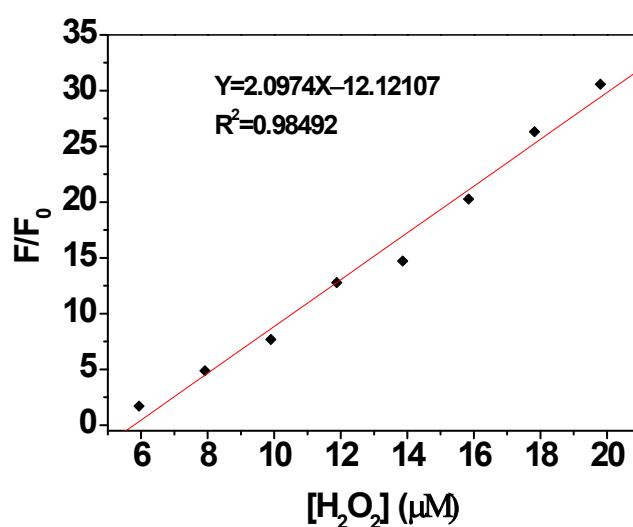

**Fig. S12** Fluorescence spectra of XC- $\text{SO}_3$  (5  $\mu\text{M}$ ) in the presence of different amounts of  $\text{H}_2\text{O}_2$  (6-20  $\mu\text{M}$ ) in HEPES aqueous buffer (DMSO: HEPES=3:7, 20 mM, pH=7.4). The intensities were recorded at 684 nm, excitation was performed at 605 nm.

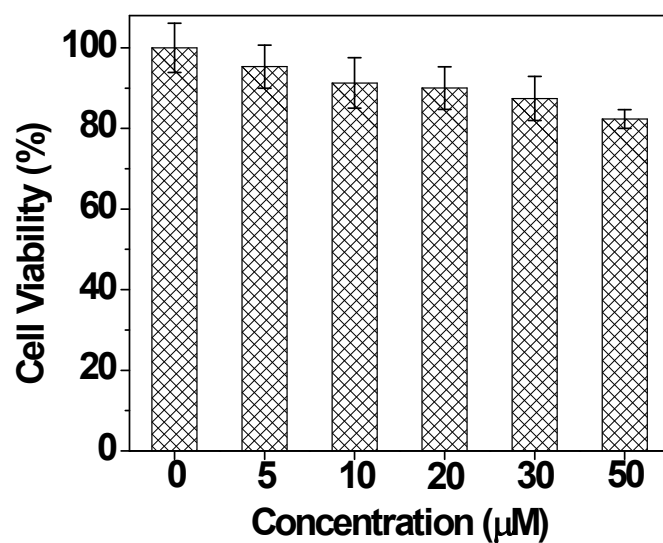

**Fig. S13** The viability of HeLa cells incubated with different concentrations of XC (0-50  $\mu\text{M}$ ) for 24 h.

**Table S1.** Comparison of this work with reported fluorescent probes for  $\text{HSO}_3^-$  detection.

| Probes  | Near-infrared | Reversible response | Selectivity                         | Detection limit        | Response time | Detection of $\text{HSO}_3^-$ intake in live animals | Detection of $\text{HSO}_3^-$ in food samples | Test papers | Ref. |
|---------|---------------|---------------------|-------------------------------------|------------------------|---------------|------------------------------------------------------|-----------------------------------------------|-------------|------|
| ASHTI   | 619nm         | No                  | $\text{HSO}_3^-$                    | 0.27 $\mu\text{M}$     | 8min          | No                                                   | No                                            | Yes         | 1    |
| QPCT    | 537nm/590 nm  | No                  | $\text{HSO}_3^-$                    | 0.44 $\mu\text{M}$     | 7min          | No                                                   | No                                            | No          | 2    |
| CPC     | 470nm/627nm   | No                  | $\text{HSO}_3^- / \text{SO}_3^{2-}$ | 18 nM                  | 10min         | No                                                   | No                                            | No          | 3    |
| PCPT    | 568nm/648nm   | No                  | $\text{HSO}_3^- / \text{SO}_3^{2-}$ | 80.5 nM                | 15min         | No                                                   | No                                            | No          | 4    |
| NBIS    | 534nm/610 nm  | No                  | $\text{HSO}_3^- / \text{SO}_3^{2-}$ | 16.2 nM                | 12min         | No                                                   | No                                            | No          | 5    |
| Probe 1 | 445nm/570 nm  | No                  | $\text{HSO}_3^-$                    | 1.29 $\mu\text{mol/L}$ | 2min          | No                                                   | No                                            | No          | 6    |

|                       |              |    |                                                                  |          |        |     |     |     |    |
|-----------------------|--------------|----|------------------------------------------------------------------|----------|--------|-----|-----|-----|----|
| <b>Cy-p-Np</b>        | 527nm/590 nm | No | HSO <sub>3</sub> <sup>-</sup>                                    | 98.1 nM  | 2.5min | No  | No  | No  | 7  |
| <b>BCVTI</b>          | 608nm        | No | HSO <sub>3</sub> <sup>-</sup>                                    | 3.3 nM   | 4min   | No  | Yes | No  | 8  |
| <b>HDI</b>            | 460nm/565 nm | No | HSO <sub>3</sub> <sup>-</sup> /<br>SO <sub>3</sub> <sup>2-</sup> | 80 nM    | 2min   | No  | No  | No  | 9  |
| <b>DQ</b>             | 620nm        | No | HSO <sub>3</sub> <sup>-</sup>                                    | 0.11 μM  | 15s    | No  | Yes | Yes | 10 |
| <b>TFBN</b>           | 504nm/644 nm | No | HSO <sub>3</sub> <sup>-</sup> /<br>SO <sub>3</sub> <sup>2-</sup> | 39 nM    | 3min   | Yes | No  | No  | 11 |
| <b>CM-B<br/>A</b>     | 462nm/568 nm | No | HSO <sub>3</sub> <sup>-</sup> /<br>SO <sub>3</sub> <sup>2-</sup> | 105 nM   | 20s    | Yes | Yes | Yes | 12 |
| <b>KQ-S<br/>O2</b>    | 475nm/600 nm | No | HSO <sub>3</sub> <sup>-</sup>                                    | 10.28 nM | 1min   | Yes | Yes | Yes | 13 |
| <b>CMQ</b>            | 640nm        | No | HSO <sub>3</sub> <sup>-</sup>                                    | 15.6 nM  | 5s     | Yes | Yes | No  | 14 |
| <b>probe 1</b>        | 450nm/594 nm | No | HSO <sub>3</sub> <sup>-</sup>                                    | 3.21 μM  | 2.5min | No  | Yes | No  | 15 |
| <b>Ph-CN</b>          | 460nm/660 nm | No | HSO <sub>3</sub> <sup>-</sup>                                    | 0.16 μM  | 5s     | Yes | No  | No  | 16 |
| <b>probe 1</b>        | 514nm        | No | HSO <sub>3</sub> <sup>-</sup>                                    | 22.8 nM  | 10s    | No  | No  | No  | 17 |
| <b>Ru-azo</b>         | 635nm        | No | HSO <sub>3</sub> <sup>-</sup>                                    | 0.69 μM  | 60min  | No  | Yes | No  | 18 |
| <b>Q5</b>             | 485nm/650 nm | No | HSO <sub>3</sub> <sup>-</sup>                                    | 89 nM    | 30min  | No  | No  | No  | 19 |
| <b>BQDs</b>           | 595nm/518 nm | No | HSO <sub>3</sub> <sup>-</sup>                                    | 0.5 μM   | 10min  | No  | No  | No  | 20 |
| <b>SNB</b>            | 478nm/671 nm | No | HSO <sub>3</sub> <sup>-</sup> /<br>SO <sub>3</sub> <sup>2-</sup> | 17 nM    | 50min  | No  | No  | No  | 21 |
| <b>DCQN</b>           | 660nm        | No | HSO <sub>3</sub> <sup>-</sup>                                    | 24 nM    | 6s     | Yes | No  | No  | 22 |
| <b>HEM-<br/>CO-Ph</b> | 615nm        | No | HSO <sub>3</sub> <sup>-</sup> /<br>SO <sub>3</sub> <sup>2-</sup> | 137 nM   | 5min   | No  | No  | No  | 23 |



|                      |                 |                                                              |                                                                  |                            |                     |     |     |     |                      |
|----------------------|-----------------|--------------------------------------------------------------|------------------------------------------------------------------|----------------------------|---------------------|-----|-----|-----|----------------------|
| <b>ZACA</b>          | 490nm/620<br>nm | No                                                           | HSO <sub>3</sub> <sup>-</sup> /<br>SO <sub>3</sub> <sup>2-</sup> | 15.6 nM                    | 13min               | No  | No  | No  | 24                   |
| <b>Mito-<br/>HN</b>  | 520nm/668<br>nm | No                                                           | HSO <sub>3</sub> <sup>-</sup> /<br>SO <sub>3</sub> <sup>2-</sup> | 0.17 μM                    | 30s                 | Yes | No  | No  | 25                   |
| <b>MITO-<br/>TPE</b> | 455nm           | No                                                           | HSO <sub>3</sub> <sup>-</sup>                                    | 27.22 μM                   | 20s                 | Yes | No  | No  | 26                   |
| <b>Hcy-<br/>Mo</b>   | 596nm           | No                                                           | HSO <sub>3</sub> <sup>-</sup>                                    | 80 nM                      | 30s                 | Yes | No  | Yes | 27                   |
| <b>RBC</b>           | 456nm/583<br>nm | No                                                           | HSO <sub>3</sub> <sup>-</sup> /<br>SO <sub>3</sub> <sup>2-</sup> | 6.6×10 <sup>-8</sup><br>M  | 35s                 | No  | No  | Yes | 28                   |
| <b>TBQN</b>          | 514nm           | No                                                           | HSO <sub>3</sub> <sup>-</sup>                                    | 3.19×10 <sup>-8</sup><br>M | 3min                | No  | No  | No  | 29                   |
| <b>XC</b>            | 605nm/684<br>nm | HSO <sub>3</sub> <sup>-</sup> /H <sub>2</sub> O <sub>2</sub> | HSO <sub>3</sub> <sup>-</sup>                                    | 1.02μM                     | within 5<br>seconds | Yes | Yes | Yes | <b>This<br/>work</b> |

## References:

1. L. Zou, J. Xu, X. Liu, X. Zhang, Y. Gao, G. Zhang and X. Duan, *Microchem. J.*, 2020, **153**, 104461.
2. J. Lia, Y. Gao, H. Guo, X. Li, H. Tang, J. Li and Y. Guo, *Dyes Pigm.*, 2019, **163**, 285-290.
3. W. Wang, X. Han, J. Liu, J. Miao and B. Zhao, *Dyes Pigm.*, 2020, **173**, 107892.
4. W. Sun, N. Li, Z. Li, Y. Yuan, J. Miao, B. Zhao and Z. Lin, *Dyes Pigm.*, 2020, **182**, 108658.
5. Z. Li, X. Cui, Y. Yan, Q. Che, J. Miao, B. Zhao and Z. Lin, *Dyes Pigm.*, 2021, **188**, 109180.
6. K. Bi, R. Tan, R. Hao, L. Miao, Y. He, X. Wu, J. Zhang and R. Xu, *Chinese Chem Lett.*, 2019, **30**, 545-548.
7. R. Shen and Y. Qian, *J Photoch Photobio A.*, 2020, **387**, 112110.
8. F. Li, L. Zou, J. Xu, F. Liu, X. Zhang, H. Li, G. Zhang and X. Duan, *J Photoch Photobio A*, 2021, **411**, 113201.
9. L. Wang, W. Yang, Y. Song, Y. Gu and Y. Hu, *Spectrochim Act A*, 2020, **225**, 117495.
10. C. Zhang, L. Han, Q. Liu, M. Liu, B. Gu and Y. Shen, *Spectrochim Act A*, 2021, **253**, 119561.
11. W. Shen, H. Xu, J. Feng, W. Sun, G. Hu, Y. Hu and W. Yang, *Spectrochim Act A*, 2021, **263**, 120183.
12. X. He, W. Xu, F. Ding, C. Xu, Y. Li, H. Chen and J. Shen, *J. Agric. Food Chem.*, 2020, **68**, 11774–11781.
13. G. Yuan, L. Zhou, Q. Yang, H. Ding, L. Tan and L. Peng, *J. Agric. Food Chem.*, 2021, **69**,

4894–4902.

14. X. Bao, X. Cao, Y. Yuan, B. Zhou and C. Huo, *J. Agric. Food Chem.*, 2021, **69**, 4903–4910.
15. X. Mu, J. Zhu, L. Yan and N. Tang, *Luminescence*, 2021, **36**, 923–927.
16. T. Zhang, L. Zhu, Y. Ma and W. Lin, *Analyst*, 2020, **145**, 1910–1914.
17. M. Wu, X. Wei, Y. Wei, R. Sun, Y. Xu and J. Ge, *Anal. Methods*, 2019, **11**, 4334–4340.
18. W. Zhang, X. Xi, Y. Wang, Z. Du, C. Liu, J. Liu, B. Song, J. Yuan and R. Zhang, *Dalton Trans.*, 2020, **49**, 5531–5538.
19. J. Zhu, F. Qin, D. Zhang, J. Tang, W. Liu, W. Cao and Y. Ye, *New J. Chem.*, 2019, **43**, 16806–16811.
20. J. Zhao, Y. Peng, K. Yang, Y. Chen, S. Zhao and Y. Liu, *RSC Adv.*, 2019, **9**, 41955–41961.
21. Y. Yan, X. He, J. Miao and B. Zhao, *J. Mater. Chem. B*, 2019, **7**, 6585–6591.
22. L. Zeng, T. Chen, B. Chen, H. Yuan, R. Sheng and G. Bao, *J. Mater. Chem. B*, 2020, **8**, 1914–1921.
23. L. Jia, L. Niu, L. Wang, X. Wang and Q. Yang, *J. Mater. Chem. B*, 2020, **8**, 1538–1544.
24. Y. Yan, Q. Wu, Q. Che, M. Ding, M. Xu, J. Miao, B. Zhao and Z. Lin, *Analyst*, 2020, **145**, 2937–2944.
25. M. Lv, Y. Zhang, J. Fan, Y. Yang, S. Chen, G. Liang and S. Zhang, *Analyst*, 2020, **145**, 7985–7992.
26. X. Yang, J. Tang, D. Zhang, X. Han, J. Liu, J. Li, Y. Zhao and Y. Ye, *Chem. Commun.*, 2020, **56**, 13217–13220.
27. R. Zhou, G. Cui, Y. Hu, Q. Qi, W. Huang and L. Yang, *RSC Adv.*, 2020, **10**, 25352–25357.
28. D. Yang, X. He, X. Wu, H. Shi, J. Miao, B. Zhao and Z. Lin, *J. Mater. Chem. B*, 2020, **8**, 5722–5728.
29. Y. Liu, L. Wu, Y. Dai, Y. Li, S. Qi, J. Du, Q. Yang, H. Xu and Y. Li, *Anal. Methods*, 2021, **13**, 3667–3675.

**Table S2. Comparison of this work with reported fluorescent probes for H<sub>2</sub>O<sub>2</sub> detection.**

| Probes                            | Near-infrared | Reversible response | Selectivity                   | Detection limit            | Response time | Ref. |
|-----------------------------------|---------------|---------------------|-------------------------------|----------------------------|---------------|------|
| BOD-H <sub>2</sub> O <sub>2</sub> | 725nm         | No                  | H <sub>2</sub> O <sub>2</sub> | 4.3×10 <sup>-7</sup> mol/L | -             | 1    |
| XH-2                              | 638 nm        | No                  | H <sub>2</sub> O <sub>2</sub> | 91 nM                      | 40min         | 2    |
| BT-HP                             | 550nm         | No                  | H <sub>2</sub> O <sub>2</sub> | 1.5×10 <sup>-7</sup> M     | 120s          | 3    |
| Cy-H <sub>2</sub> O <sub>2</sub>  | 790 nm        | No                  | H <sub>2</sub> O <sub>2</sub> | 65 nM                      | 10min         | 4    |

|                                        |                                                                              |                                                              |                                                              |                                                                               |                                                                             |           |
|----------------------------------------|------------------------------------------------------------------------------|--------------------------------------------------------------|--------------------------------------------------------------|-------------------------------------------------------------------------------|-----------------------------------------------------------------------------|-----------|
| <b>DCHP</b>                            | 653nm                                                                        | No                                                           | H <sub>2</sub> O <sub>2</sub>                                | 5.3 μM                                                                        | 15min                                                                       | 5         |
| <b>Cou-CHO</b>                         | 502nm                                                                        | No                                                           | H <sub>2</sub> O <sub>2</sub>                                | 31 nM                                                                         | 20min                                                                       | 6         |
| <b>RhB-NIR</b>                         | 730nm                                                                        | No                                                           | H <sub>2</sub> O <sub>2</sub>                                | 61 nM                                                                         | 10min                                                                       | 7         |
| <b>GCP</b>                             | 482nm/706nm                                                                  | No                                                           | H <sub>2</sub> O <sub>2</sub>                                | 0.33 μM                                                                       | 15min                                                                       | 8         |
| <b>BPN-TOB</b>                         | 471nm                                                                        | No                                                           | H <sub>2</sub> O <sub>2</sub>                                | 67 nM                                                                         | 10min                                                                       | 9         |
| <b>Hcy-OB</b>                          | HSO <sub>3</sub> <sup>-</sup> :392nm<br>H <sub>2</sub> O <sub>2</sub> :520nm | No                                                           | HSO <sub>3</sub> <sup>-</sup> /H <sub>2</sub> O <sub>2</sub> | HSO <sub>3</sub> <sup>-</sup> :120 nM<br>H <sub>2</sub> O <sub>2</sub> :70 nM | HSO <sub>3</sub> <sup>-</sup> :1min<br>H <sub>2</sub> O <sub>2</sub> :20min | 10        |
| <b>BTFMB</b>                           | 542nm                                                                        | No                                                           | H <sub>2</sub> O <sub>2</sub>                                | 109 nM                                                                        | 45min                                                                       | 11        |
| <b>TPP-HCy-BOH and HCy-BOH</b>         | TPP-HCy-BOH:716nm<br>HCy-BOH:706nm                                           | No                                                           | H <sub>2</sub> O <sub>2</sub>                                | TPP-HCy-BOH:0.348 μM<br>HCy-BOH:1.064 μM                                      | -                                                                           | 12        |
| <b>QX-B</b>                            | 772nm                                                                        | No                                                           | H <sub>2</sub> O <sub>2</sub>                                | 0.17 μM                                                                       | 5min                                                                        | 13        |
| <b>GW-1</b>                            | 549nm                                                                        | No                                                           | H <sub>2</sub> O <sub>2</sub>                                | -                                                                             | 30min                                                                       | 14        |
| <b>Mito-Bor</b>                        | 730nm                                                                        | No                                                           | H <sub>2</sub> O <sub>2</sub>                                | 23 nM                                                                         | 25min                                                                       | 15        |
| <b>TTPB</b>                            | Viscosity: 666nm<br>H <sub>2</sub> O <sub>2</sub> : 586nm                    | No                                                           | Viscosity/<br>H <sub>2</sub> O <sub>2</sub>                  | 0.141 μmol/L                                                                  | -                                                                           | 16        |
| <b>QVB-B</b>                           | 464nm/580nm                                                                  | No                                                           | H <sub>2</sub> O <sub>2</sub>                                | -                                                                             | 60min                                                                       | 17        |
| <b>TC-H<sub>2</sub>O<sub>2</sub></b>   | 920nm                                                                        | No                                                           | H <sub>2</sub> O <sub>2</sub>                                | -                                                                             | 30min                                                                       | 18        |
| <b>TTPy-H<sub>2</sub>O<sub>2</sub></b> | 590nm                                                                        | No                                                           | H <sub>2</sub> O <sub>2</sub>                                | 0.25 μM                                                                       | 50min                                                                       | 19        |
| <b>NPT-H<sub>2</sub>O<sub>2</sub></b>  | 550nm/425nm                                                                  | No                                                           | H <sub>2</sub> O <sub>2</sub>                                | 12.8 nM                                                                       | 40s                                                                         | 20        |
| <b>XC-SO<sub>3</sub></b>               | 605nm/684nm                                                                  | HSO <sub>3</sub> <sup>-</sup> /H <sub>2</sub> O <sub>2</sub> | H <sub>2</sub> O <sub>2</sub>                                | 0.84 μM                                                                       | 16 min                                                                      | This work |

## References:

1. X. Li, Y. Zhao, J. Zheng and T. Zhang, *J. Lumin.*, 2021, **229**, 117642.

2. L. Xu, Y. Zhang, L. Zhao, H. Han, S. Zhang, Y. Huang, X. Wang, D. Song, P. Ma, P. Ren and Y. Sun, *Talanta*, 2021, **233**, 122578.
3. M. Ren, D. Dong, Q. Xu, J. Yin, S. Wang and F. Kong, *Talanta*, 2021, **234**, 122684.
4. X. Huang, Z. Li, Z. Liu, C. Zeng and L. Hu, *Dyes Pigm.*, 2019, **165**, 518–523.
5. Y. He, L. Miao, L. Yu, Q. Chen, Y. Qiao, J. Zhang and Y. Zhoua, *Dyes Pigm.*, 2019, **168**, 160–165.
6. F. Wu, H. Yu, Q. Wang, J. Zhang, Z. Li and X. Yang, *Dyes Pigm.*, 2021, **190**, 109335.
7. T. Gu, S. Mo, Y. Mu, X. Huang and L. Hu, *Sensor Actuat B*, 2020, **309**, 127731.
8. W. Jiang, W. Wang, J Liu, Y. Li and C. Li, *Sensor Actuat B*, 2020, **313**, 128054.
9. P. Hou, S. Chen, G. Liang, H. Li and H. Zhang, *Spectrochim. Acta A*, 2020, **236**, 118338.
10. R. Zhou, L. Niu, Y. Hu, Q. Qi, W. Huang and L. Yang, *Spectrochim. Acta A*, 2021, **248**, 119226.
11. H. Zhang, D. Tian, Y. Zheng, F. Dai and B. Zhou, *Spectrochim. Acta A*, 2021, **248**, 119264.
12. X. Chen, X. Ren, L. Zhang, Z. Liu and Z. Hai, *Anal. Chem.*, 2020, **92**, 14244–14250.
13. W. Wang, W. Jiang, G. Mao, M. Tan, J. Fei, Y. Li and C. Li, *Anal. Chem.*, 2021, **93**, 3301–3307.
14. J. Su, S. Zhang, C. Wang, M. Li, J. Wang, F. Su and Z. Wang, *ACS Omega*, 2021, **6**, 14819–14823.
15. X. Song, S. Bai, N. He, R. Wang, Y. Xing, C. Lv and F. Yu, *ACS Sens.*, 2021, **6**, 1228–1239.
16. L. Fan, Q. Zan, X. Wang, S Wang, Y. Zhang, W Dong, S Shuang and C. Dong, *Chin. J. Chem.*, 2021, **39**, 1303–1309.
17. G. Yang, T. Zhu, D. Wang, Z. Liu, R. Zhang, G. Han, X. Tian, B. Liu, M. Han and Z. Zhang, *Chem. Commun.*, 2021, **57**, 6628–6631.
18. L. Chen, J. Chen, Y. Fang, F. Zeng and S. Wu, *Chem. Commun.*, 2021, **57**, 7842–7845.
19. Q. Wu, Y. Li, Y. Li, D. Wang and B. Tang, *Mater. Chem. Front.*, 2021, **5**, 3489–3496.
20. R. Zhou, Q. Peng, D. Wan, C. Yu, Y. Zhang, Y. Hou, Q. Luo, X. Li, S. Zhang, L. Xie, P. Ou and Y. Peng, *RSC Adv.*, 2021, **11**, 24032–24037.
